# Supplementary material for: Modular automated bottom-up proteomic sample preparation for high-throughput applications
Source: PubMed Central journal article supplement (PMC8880914; doi:10.1371/journal.pone.0264467), 2022-02-25
Supplement: pone.0264467.s003.pdf [file pone.0264467.s003.pdf]

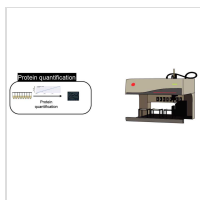

2 ▼

Jan 12, 2022

# Automated Protein Quantification with the Biomek-FX Liquid Handler System V.2

1

Yan Chen<sup>1</sup>, Nurgul Kaplan Lease<sup>1</sup>, Tad Ogorzalek<sup>1</sup>, Jennifer Gin<sup>1</sup>,  
Christopher J Petzold<sup>1</sup>

<sup>1</sup>Lawrence Berkeley National Laboratory

1

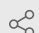

[dx.doi.org/10.17504/protocols.io.b3grqjv6](https://dx.doi.org/10.17504/protocols.io.b3grqjv6)

LBNL omics

Agile BioFoundry 1

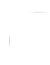

Jennifer Gin  
Lawrence Berkeley National Laboratory

This protocol details steps to perform the protein quantification (Lowry-based) assay by using a Biomek FX liquid handler system. It is optimized to assay a full 96-well plate of protein samples in duplicate with a separate (control) plate for BSA standards. You will need a plate reader to measure the samples and standards.

This protocol works best as part of a full proteomic sample preparation workflow with:

[Automated Chloroform-Methanol Protein Extraction on the Biomek-FX Liquid Handler System](#)

and

[Automated Protein Normalization and Tryptic Digestion on a Biomek-FX Liquid Handler System](#)

DOI

[dx.doi.org/10.17504/protocols.io.b3grqjv6](https://dx.doi.org/10.17504/protocols.io.b3grqjv6)

Yan Chen, Nurgul Kaplan Lease, Tad Ogorzalek, Jennifer Gin, Christopher J Petzold 2022. Automated Protein Quantification with the Biomek-FX Liquid Handler System. **protocols.io**  
<https://dx.doi.org/10.17504/protocols.io.b3grqjv6>  
Christopher Petzold

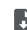

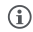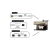

## Modular automated bottom-up proteomic sample preparation for high-throughput applications

Protein quantification, Automation, Biomek, Lowry assay, Proteomics, Sample preparation

\_\_\_\_\_ protocol ,

Jonathan Vu

Jan 04, 2022

Jan 12, 2022

Jan 12, 2022

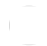

Jennifer Gin

Lawrence Berkeley National Laboratory

56561

Part of collection

[Modular automated bottom-up proteomic sample preparation for high-throughput applications](#)

- A Beckman-Coulter Biomek FX liquid handler system with a 96-pod head is used for this protocol. Alternative liquid handlers can be used with appropriate method development.

- A Molecular Devices Spectramax 250 microplate reader is used for the protein quantification assay measurement.

- Because different deck orientations and system components are possible, you will need to modify the method file (attached in the 'Before start' section) for your specific Biomek liquid handler system.

Notes:

- This protocol is set up to measure the amount of protein in duplicate.

Hard-Shell 96-Well PCR Plates low profile thin wall skirted white/clear BIO-RAD Catalog #HSP9601  
Pierce Bovine Serum Albumin Standard Pre-Diluted Set Thermo Fisher, Catalog #23208  
20 uL pipet tips Molecular Bioproducts BioRobotix, Catalog #918-262  
200 uL pipet tips Molecular Bioproducts BioRobotix, Catalog #919-262  
Corning 96 Well Black Polystyrene Microplate Fisher Scientific, Catalog #07-200-567  
Reservoir Microplate Agilent, Catalog #201254-100  
96 Deep Well Reagent Reservoir VWR, Catalog #101100-962  
Water LC-MS grade B&J Brand VWR Scientific, Catalog #BJLC365-2.5  
DC Protein Assay Reagent A by Bio-rad Laboratories, Catalog #500-0113  
DC Protein Assay Reagent B by Bio-rad Laboratories, Catalog #500-0114  
8-strip PCR Tubes with Caps Axygen, Catalog #14-222-251

Wear proper PPE (gloves, safety goggles, and lab coat), and prepare solvents in a chemical fume hood.

Store organic solvents in a flammable storage cabinet when not in use.

Discard used solvents and buffers in appropriate waste containers.

Prepare BSA Standards Plate (1st 4 rows from A to D):

1. Add 40 uL of H<sub>2</sub>O into wells A1 to D1.
2. Add 40 uL of BSA Standards 1 (125 ug/mL) to 7 (2000 ug/mL) into columns 2 to 8.

For this protocol you will need:

1. Beckman-Coulter Biomek FX liquid handler system with a 96-pod head.
2. Upload the attached method file and modify it to fit your deck and system configuration.

 [Modular Protein Quantitation method.bmf](#)

## Deck Setup

10m

- 1 Open Biomek Software that controls Biomek-FX liquid handler system. Under "File" drop-down menu, click "Open" to select the automation method "Modular Protein Quantitation method."

Because different deck orientations and system components are possible, you will need to modify the method file (attached in the 'Before start' section) for your specific Biomek liquid handler system.

- 2 Click on "Instrument Setup" under the "Setup" group node to get visual instruction on how to set up the deck.

- 3 Set up the deck (refer to the deck setup picture below):

10m

| A                                             | B                                                                   | C                                                                |
|-----------------------------------------------|---------------------------------------------------------------------|------------------------------------------------------------------|
| Deck Label                                    | Labware                                                             | Reagent                                                          |
| <b>protein</b>                                | PCR96 plate (BIO-RAD, Cat.#HSP9601)                                 | unknown amount of protein to quantify                            |
| <b>titrate</b>                                | PCR96 plate (BIO-RAD, Cat.#HSP9601)                                 |                                                                  |
| <b>BSA standards</b>                          | PCR96 plate                                                         | BSA Standards (Thermo Fisher, Cat.#23208)                        |
| <b>tips1,2</b>                                | 20 µl pipet tips (Molecular Bioproducts BioRobotix, Cat.#918-262 )  |                                                                  |
| <b>tips 3,5</b>                               | 200 uL pipet tips (Molecular Bioproducts BioRobotix, Cat.#919-262 ) |                                                                  |
| <b>control read, prot read 1, prot read 2</b> | Black Microplate (Fisher Scientific, Cat.#07-200-567)               |                                                                  |
| <b>Buffer A</b>                               | Reservoir Microplate (Agilent, Cat.#201254-100)                     | DC Protein Assay Reagent A (Bio-rad Laboratories, Cat.#500-0113) |
| <b>water</b>                                  | Reservoir Microplate (Agilent, Cat.#201254-100)                     | LC-MS grade Water (VWR Scientific, Cat.#BJLC365-2.5)             |
| <b>Buffer B</b>                               | 96 Deep Well Reagent Reservoir (VWR, Cat.#101100-962)               | DC Protein Assay Reagent B (Bio-rad Laboratories, Cat.#500-0114) |

Materials for Deck setup

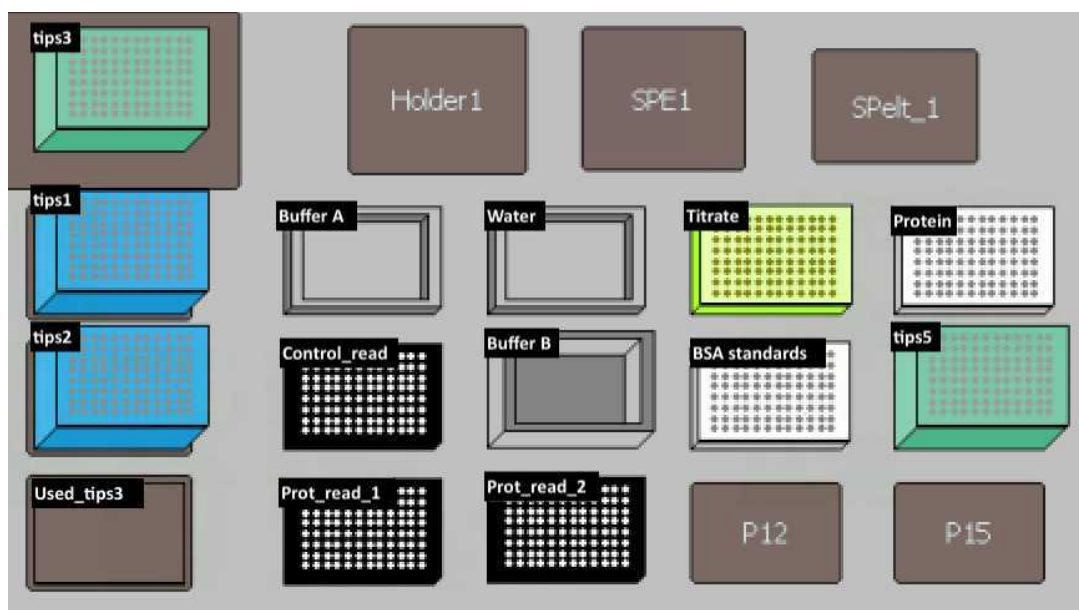

Deck setup

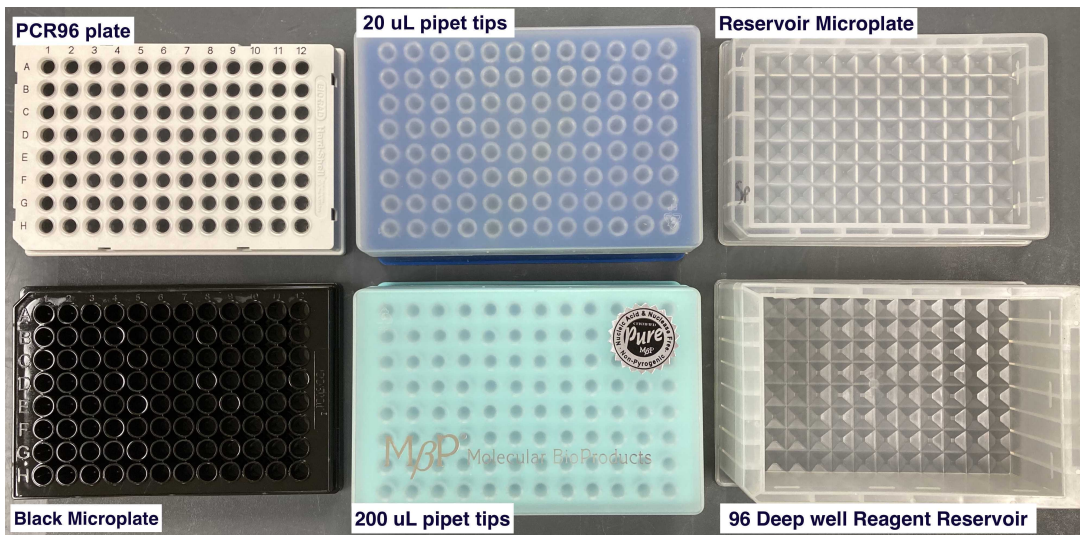

Labware for Deck setup

- 4 MANUAL STEP: Use a multichannel pipette to mix protein samples right before starting. 2m
- 5 Click the "Run" button (green arrow) to start.

DC protein assay 25m

- 6 Transfer 25  $\mu$ l of Buffer A to Protein Read plate 1, Protein Read plate 2, and Control Read plate. 1m

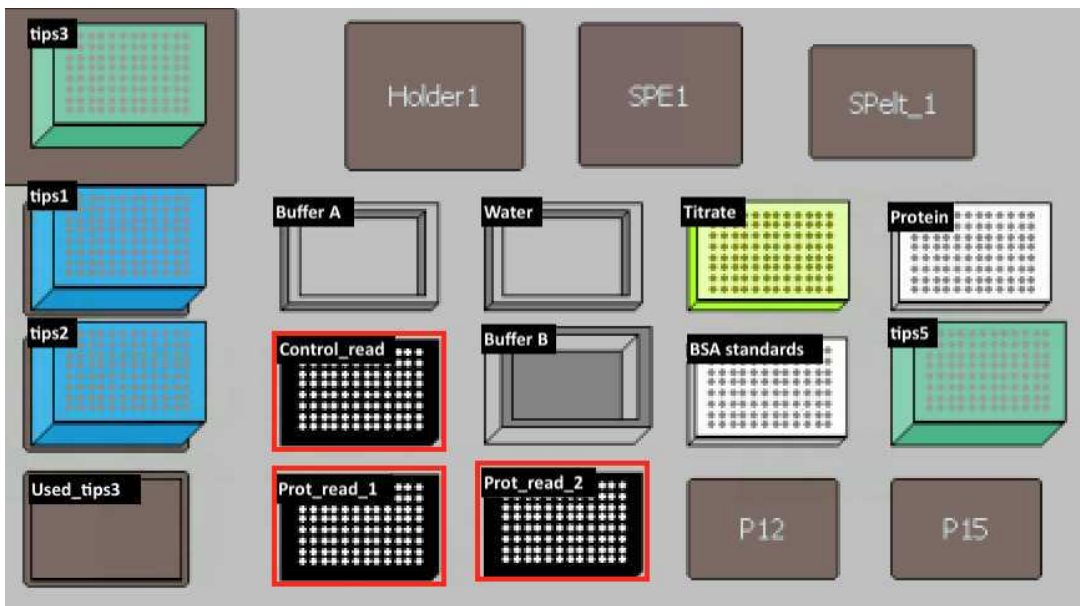

- 7 Transfer 12  $\mu\text{l}$  of  $\text{H}_2\text{O}$  into Titrate plate. Then transfer 3  $\mu\text{l}$  (see Note for more details) from Protein plate to Titrate plate and mix with 5 cycles of pipetting mixing on deck. <sup>1m</sup>

Note: The dilution factor could be altered as needed by changing the volumes of water and proteins transferred to the titration plate. Be sure to multiply the protein quant results by the dilution factor before you do your normalization calculation.

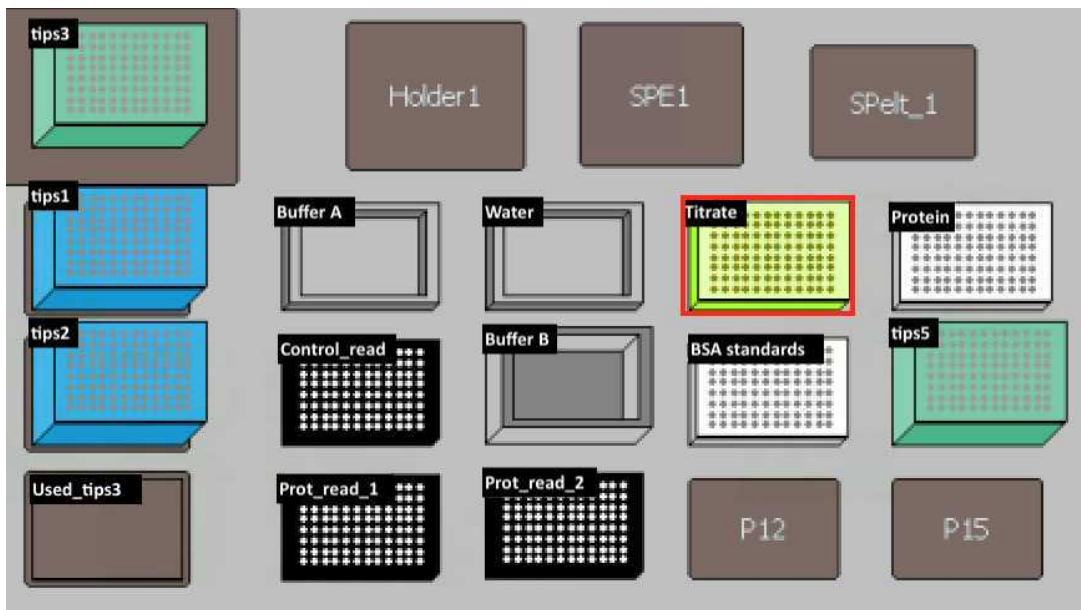

- 8 Transfer 5  $\mu\text{l}$  of protein from Titrate plate to Protein Read plate 1 and Protein Read plate 2. <sup>1m</sup>

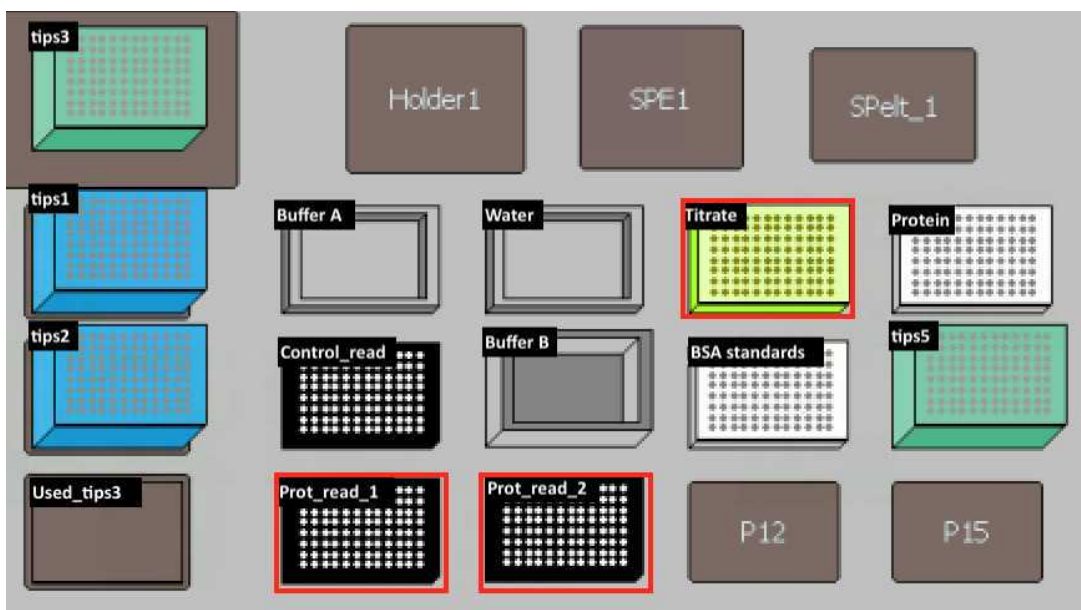

9 Transfer 5  $\mu\text{l}$  from BSA Standards plate to Control Read plate.

1m

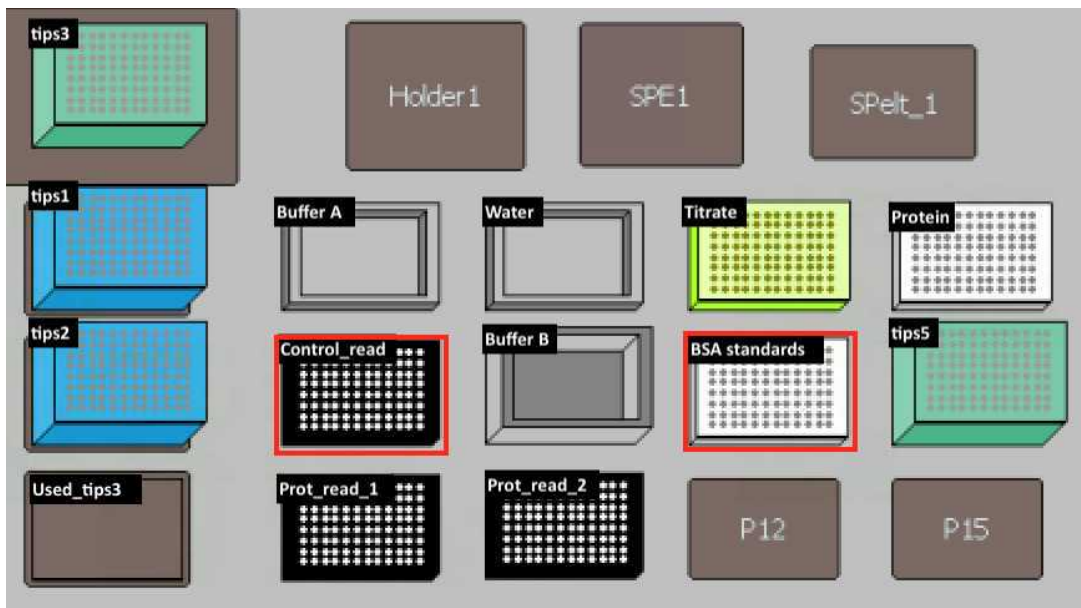

Prepare BSA Standards plate (1st 4 rows from A to D):  
Add 40  $\mu\text{l}$  of  $\text{H}_2\text{O}$  into wells A1 to D1.  
Add 40  $\mu\text{l}$  of BSA Standards 1 (125  $\mu\text{g}/\text{ml}$ ) to 7 (2000  $\mu\text{g}/\text{ml}$ ) into columns 2 to 8.

10 Method will pause until user resumes it again. Set a timer for 5 minutes.

5m

11 After 5 min, click OK to resume method.

12 Transfer 200  $\mu\text{l}$  from Buffer B to the 3 Read plates and incubate for **00:10:00**.

10m

The method will pause until user resumes it again. Set up a 10 minutes timer and click OK afterwards to finish.

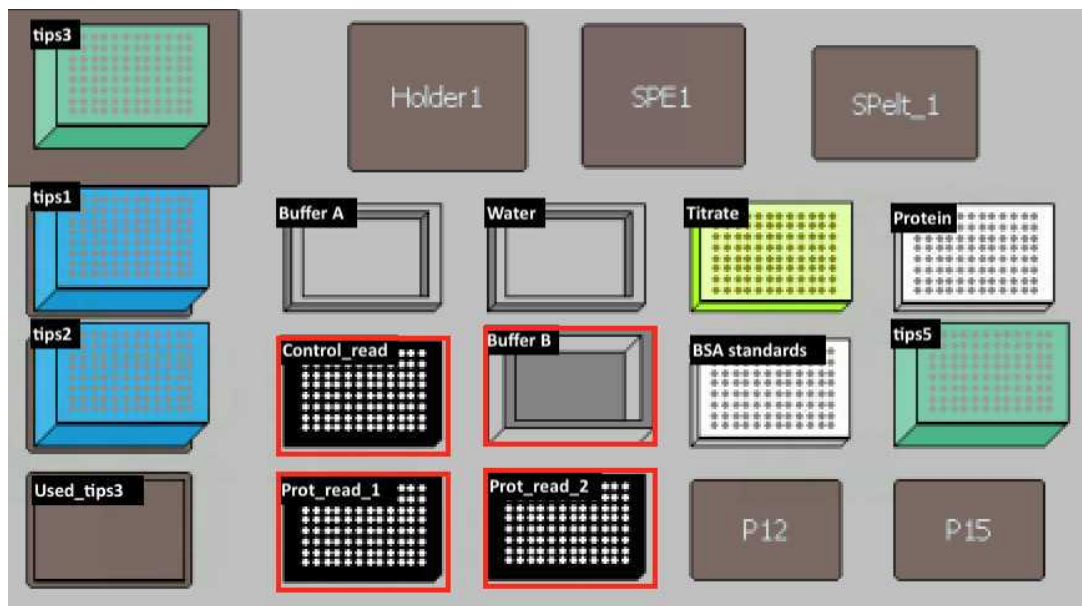

Spectrophotometer reading for protein Quantification 10m

13 Transfer plates to the microplate reader (MD Spectramax 250) to read absorbance at 750 nm<sup>1m</sup> and calculate protein concentration.

14 Read Control Read plate. 1m

| A      | B             | C                          |
|--------|---------------|----------------------------|
| Sample | Concentration | Mean OD Value (Absorbance) |
| St01   | 125           | 0.024                      |
| St02   | 250           | 0.042                      |
| St03   | 500           | 0.090                      |
| St04   | 750           | 0.138                      |
| St05   | 1000          | 0.165                      |
| St06   | 1500          | 0.239                      |
| St07   | 2000          | 0.281                      |

Standards (µg/ml)



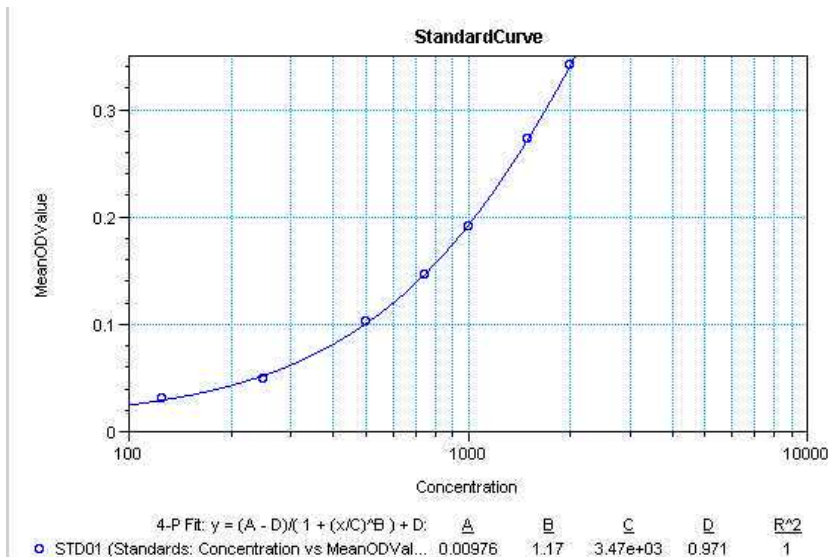

Example Standards Curve

15 Read Protein Read plate 1 and Protein Read plate 2.

2m

| A      | B             |
|--------|---------------|
| Sample | Concentration |
| Un88   | 585.249       |
| Un89   | 785.257       |
| Un90   | 670.135       |
| Un91   | 718.864       |
| Un92   | 868.962       |
| Un93   | 679.907       |
| Un94   | 743.064       |
| Un95   | 994.173       |
| Un96   | 1115.072      |

Examples of Sample concentrations that are reported by MD Spectramax 250

Remember to multiply the protein concentrations by five (5) to account for the five-fold dilution in Step #7.

- 
- 
- 16 Store protein plate at  $\delta$  **-20 °C** until ready for [Automated Protein Normalization and Tryptic Digestion on a Biomek-NX Liquid Handler System](#).
